# Supplementary material for: Cortical entrainment to hierarchical contextual rhythms recomposes dynamic attending in visual perception
Source: eLife. 2021 Jun 4;10:e65118. doi: 10.7554/eLife.65118 (PMC8177885; doi:10.7554/eLife.65118)
Supplement: Figure 1—source data 1. [file elife-65118-fig1-data1.xlsx]

## Sheet: Aud_rhythmic
Rhythmic_B	Rhythmic_W	Baseline_B	Baseline_W
0.7632	0.675	0.6154	0.625
0.95	0.9211	0.8158	0.9211
0.7353	0.8462	0.697	0.825
0.6667	0.5385	0.5	0.5405
0.7	0.697	0.7105	0.7297
0.8649	0.6757	0.8205	0.6667
0.5128	0.4474	0.6154	0.5641
0.5405	0.5641	0.5833	0.4722
0.9167	0.8571	0.7941	0.8182
0.875	0.8205	0.8205	0.85
0.9487	0.875	0.8462	0.8718
0.7429	0.5897	0.6316	0.6944
0.8	0.7714	0.85	0.8611
0.6	0.6316	0.359	0.5385
0.625	0.5385	0.6667	0.525
0.8378	0.7632	0.8718	0.775

## Sheet: Aud_arrhythmic
Arrhythmic_B	Arrhtyhmic_W	Baseline_B	Baseline_W
0.5135	0.6154	0.325	0.4865
0.4872	0.5789	0.3684	0.45
0.7143	0.7568	0.7222	0.8684
0.4	0.275	0.35	0.3077
0.3846	0.2564	0.4444	0.3333
0.7778	0.7436	0.6579	0.7714
0.3846	0.325	0.4615	0.3947
0.6944	0.725	0.725	0.725
0.675	0.6154	0.575	0.475
0.8974	0.925	0.9459	0.8649
0.925	0.95	0.8974	0.8974
0.9231	0.8889	0.7895	0.8378
0.9231	0.8205	0.9487	0.9211
0.7179	0.7179	0.875	0.7895
0.6667	0.85	0.641	0.925
0.4571	0.3429	0.3784	0.4722
