# Supplementary material for: Cortical entrainment to hierarchical contextual rhythms recomposes dynamic attending in visual perception
Source: eLife. 2021 Jun 4;10:e65118. doi: 10.7554/eLife.65118 (PMC8177885; doi:10.7554/eLife.65118)
Supplement: Figure 2—source data 1. [file elife-65118-fig2-data1.xlsx]

## Sheet: Frequency
2Hz_Between	2Hz_Within	3.3Hz_Between	3.3Hz_Within
0.615385	0.666667	0.615385	0.551724
0.677419	0.645161	0.870968	0.709677
0.53125	0.483871	0.444444	0.387097
0.48	0.296296	0.384615	0.375
0.7	0.689655	0.870968	0.774194
0.321429	0.178571	0.375	0.354839
0.709677	0.741935	0.6	0.677419
0.346154	0.173913	0.346154	0.25
0.464286	0.291667	0.642857	0.62963
0.461538	0.5	0.807692	0.44
0.709677	0.538462	0.8	0.758621
0.3125	0.225806	0.193548	0.15625
0.366667	0.354839	0.551724	0.5
0.92	0.88	0.875	0.888889
0.666667	0.62963	0.666667	0.666667
0.769231	0.541667	0.772727	0.758621

## Sheet: Irregular
Irreg-G_Between	Irreg-G_Within	Irreg-T_Between	Irreg-T_Within
0.518519	0.5	0.6	0.6875
0.827586	0.925926	0.75	0.423077
0.785714	0.689655	0.586207	0.516129
0.714286	0.62963	0.551724	0.851852
0.28	0.333333	0.709677	0.46875
0.222222	0.346154	0.740741	0.821429
0.423077	0.541667	0.806452	0.7
0.541667	0.652174	0.785714	0.92
0.678571	0.533333	0.821429	0.857143
0.333333	0.37931	0.266667	0.407407
0.655172	0.75	0.428571	0.444444
0.785714	0.827586	0.566667	0.555556
0.25	0.28	0.612903	0.517241
0.607143	0.384615	0.8125	0.740741
0.586207	0.592593	0.37037	0.387097
0.592593	0.576923	0.607143	0.535714
