# Supplementary material for: Cortical entrainment to hierarchical contextual rhythms recomposes dynamic attending in visual perception
Source: eLife. 2021 Jun 4;10:e65118. doi: 10.7554/eLife.65118 (PMC8177885; doi:10.7554/eLife.65118)
Supplement: Figure 3—source data 1. [file elife-65118-fig3-data1.xlsx]

## Sheet: RhythmicColor
Rhythmic_B	Rhythmic_W	Baseline_B	Baseline_W
0.526316	0.513514	0.567568	0.487179
0.766667	0.567568	0.727273	0.666667
0.8125	0.818182	0.685714	0.742857
0.638889	0.6	0.69697	0.578947
0.410256	0.447368	0.447368	0.447368
0.657143	0.475	0.583333	0.527778
0.621622	0.388889	0.393939	0.424242
0.783784	0.657895	0.657143	0.676471
0.852941	0.805556	0.763158	0.885714
0.666667	0.641026	0.842105	0.810811
0.846154	0.777778	0.714286	0.705882
0.725	0.769231	0.615385	0.625
0.564103	0.378378	0.444444	0.447368
0.846154	0.8	0.8	0.833333
0.842105	0.775	0.864865	0.684211
0.482759	0.419355	0.1875	0.233333

## Sheet: ArrhythmicColor
Arrhythmic_B	Arrhtyhmic_W	Baseline_B	Baseline_W
0.717949	0.684211	0.692308	0.783784
0.486486	0.594595	0.558824	0.583333
0.432432	0.594595	0.472222	0.459459
0.684211	0.666667	0.6	0.756757
0.921053	0.894737	0.923077	0.9
0.615385	0.74359	0.775	0.666667
0.725	0.756757	0.769231	0.74359
0.777778	0.756757	0.916667	0.75
0.771429	0.722222	0.763158	0.789474
0.694444	0.882353	0.702703	0.722222
0.525	0.552632	0.435897	0.486486
0.758621	0.685714	0.676471	0.545455
0.605263	0.567568	0.589744	0.447368
0.7	0.794872	0.513514	0.631579
0.461538	0.605263	0.473684	0.447368
0.675676	0.513514	0.378378	0.378378

## Sheet: Motion
Cyclic_Between	Cyclic_Within	Random_Between	Random_Within
0.875	0.65625	0.75	0.833333
0.774194	0.7	0.6875	0.655172
0.517241	0.533333	0.571429	0.566667
0.833333	0.78125	0.6875	0.666667
0.78125	0.766667	0.709677	0.645161
0.586207	0.366667	0.655172	0.464286
0.666667	0.8	0.4375	0.517241
0.785714	0.607143	0.580645	0.533333
0.5	0.5	0.5	0.5625
0.774194	0.483871	0.59375	0.4375
0.586207	0.548387	0.40625	0.6875
0.677419	0.645161	0.551724	0.548387
0.566667	0.290323	0.448276	0.4
0.3	0.241379	0.310345	0.448276
0.461538	0.464286	0.419355	0.407407
0.6	0.612903	0.535714	0.62069
