# Supplementary material for: Cortical entrainment to hierarchical contextual rhythms recomposes dynamic attending in visual perception
Source: eLife. 2021 Jun 4;10:e65118. doi: 10.7554/eLife.65118 (PMC8177885; doi:10.7554/eLife.65118)
Supplement: Figure 4—source data 1. [file elife-65118-fig4-data1.xlsx]

## Sheet: Spectrum
frequency	Evoked_Power	Evoked_Power_SE	ITPC	ITPC_SE	Induced_Power	Induced_Power_SE
1	-3.99357	0.877645	0.434437	0.0310026	-0.940235	0.101417
1.5	1.45589	0.919102	0.294833	0.0198854	-0.276334	0.130698
2	-2.92216	0.817787	0.28795	0.0181255	-0.581347	0.0890231
2.5	2.85276	0.497887	0.246338	0.0125819	0.203519	0.109857
3	-1.4237	0.684868	0.34191	0.0140854	-0.234643	0.10241
3.5	0.205529	0.665484	0.288648	0.0191081	-0.0486574	0.093762
4	-0.341011	0.830019	0.280016	0.0127877	0.00283089	0.099173
4.5	-0.0633945	0.771181	0.304564	0.0159095	0.00439385	0.118047
5	1.67785	0.681094	0.300073	0.0182683	0.0128003	0.137412
5.5	-1.10616	0.719004	0.316015	0.0153646	-0.0882832	0.10282
6	-0.78664	0.563162	0.241178	0.0184797	-0.0263333	0.0697313
6.5	1.07764	0.504733	0.225506	0.0147956	0.0232568	0.0731059
7	-1.80432	0.548495	0.25488	0.0174069	-0.103232	0.0973131
7.5	2.30837	0.326529	0.240618	0.0199144	0.188362	0.112524
8	-0.981742	0.507629	0.292565	0.0232657	-0.334386	0.0780239
8.5	-0.636032	0.582847	0.237157	0.017454	0.0196278	0.0971663
9	-2.03512	0.747556	0.235903	0.0219617	-0.385658	0.111355
9.5	0.850532	0.612974	0.261964	0.0246615	-0.239564	0.133858
10	6.05442	0.570621	0.360715	0.0280096	1.60104	0.24326
10.5	-4.41494	0.948094	0.458988	0.0314271	-0.84502	0.206158
11	1.88027	0.784179	0.203575	0.019831	0.306675	0.140558
11.5	-1.60534	0.727779	0.214126	0.0237909	0.287184	0.193713
12	-0.408889	0.593727	0.143786	0.0101235	-0.0707999	0.0547708

## Sheet: Correlation
subnum	BMI	Evoked_Pow_lPO	Pow_frontal	ITPC_lPO	ITPC_frontal	Induced_Pow_lPO
1	0.00503871	2.61191	6.82927	0.530642	0.331928	0.766086
2	0.117489	4.83656	4.52481	0.546305	0.363625	1.16999
3	0.0227273	10.5063	0.442712	0.498817	0.312629	1.19111
4	0.0040367	-0.518016	0.144784	0.249206	0.280615	-0.0511075
5	0.0618345	4.59706	4.92897	0.537453	0.365855	0.518271
6	0.0698236	3.47411	4.32477	0.318659	0.245654	0.265502
7	-0.0512129	-0.544008	-1.98643	0.30204	0.353404	-1.15986
8	0.0853317	0.996298	1.54332	0.478938	0.356777	0.155397
9	0.00235039	-6.16509	0.532104	0.295522	0.162186	-0.10283
10	0.125382	11.9291	4.47792	0.558897	0.584132	0.960516
11	-0.0189633	-7.54744	-5.45168	0.216196	0.121461	-0.6722
12	0.143575	9.94503	6.74778	0.510059	0.474	1.14475
13	0.0252283	8.40233	1.63501	0.427576	0.349461	0.956338
14	0.0526788	0.261419	2.10959	0.480394	0.411798	0.142621
15	0.0904818	7.32412	7.06912	0.513232	0.463901	1.43425
16	0.074141	-2.39062	0.571429	0.275694	0.361158	-0.761582
