# Supplementary material for: Cortical entrainment to hierarchical contextual rhythms recomposes dynamic attending in visual perception
Source: eLife. 2021 Jun 4;10:e65118. doi: 10.7554/eLife.65118 (PMC8177885; doi:10.7554/eLife.65118)
Supplement: Figure 5—source data 1. [file elife-65118-fig5-data1.xlsx]

## Sheet: T2alpha_-100-0ms
subnum	T2_alpha_pow_lROI_B	T2_alpha_pow_lROI_W
1	0.549911	0.150618
2	-2.50321	-3.4535
3	-1.64786	-2.10266
4	-0.126975	0.295923
5	1.18186	0.588703
6	-2.52712	-1.02288
7	-0.400079	0.533518
8	2.1057	1.36133
9	-3.09981	-4.75847
10	1.74449	0.505015
11	-3.05711	-4.15197
12	-1.74757	-2.42466
13	-1.9208	-2.83677
14	0.117981	-0.750563
15	-1.60072	-2.99342
16	1.6827	-0.399475

## Sheet: T2alpha_0-100ms
subnum	T2_alpha_pow_lROI_B	T2_alpha_pow_lROI_W
1	-0.230888	-1.3689
2	-3.77474	-3.8376
3	-0.541115	-1.02601
4	-0.0895161	0.162923
5	1.29745	0.467126
6	-2.07373	-1.08988
7	0.710281	0.577334
8	2.35559	1.79833
9	-1.97523	-2.92676
10	2.15219	0.169347
11	-3.98782	-4.25513
12	-0.10365	-1.52259
13	-1.22611	-2.03074
14	0.696997	0.171433
15	-1.91543	-3.46428
16	1.35512	-0.718303

## Sheet: Coupling
subnum	PAC_Between	PAC_Within	BMI	PACdiff_norm
1	0.550418	0.565518	0.005	-0.0166819
2	0.833127	0.749887	0.1175	0.0447445
3	0.605957	0.565378	0.0227	0.0351492
4	0.403717	0.456939	0.004	-0.0613798
5	0.781705	0.735998	0.0618	0.0276568
6	0.768508	0.752867	0.0698	0.00849062
7	0.523503	0.568352	-0.0512	-0.0418141
8	0.9864	0.809989	0.0853	0.0929225
9	0.598603	0.602338	0.0024	-0.00600231
10	0.615163	0.563791	0.1254	0.0341294
11	1.02534	0.98155	-0.019	0.0208959
12	0.41245	0.387747	0.1436	0.0287164
13	0.791876	0.773747	0.0252	0.0103241
14	1.407	1.39398	0.0527	0.00387805
15	0.961279	0.878765	0.0905	0.0460396
16	0.586197	0.532839	0.0741	0.0470993
